# Supplementary material
Source: MDPI journal article supplement (https://www.mdpi.com/2071-1050/15/9/7656)
Supplement: s1 [file s1]

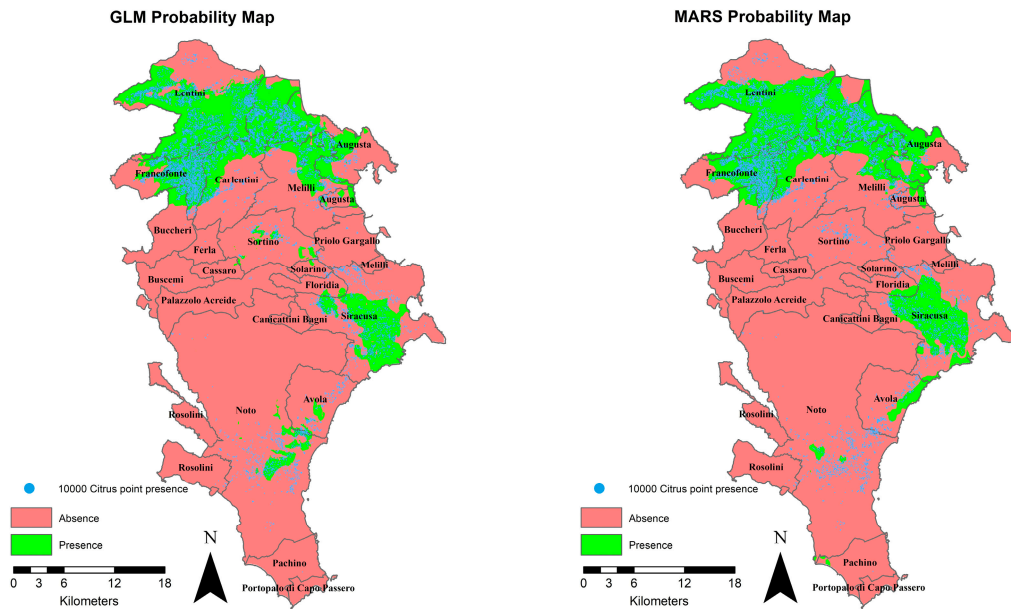

**Figure S1** - Probability maps of species distribution for a 0.8 value for Pearson-Spearman-Kendall coefficients threshold, 10000 presence points, default values of models' parameters, and 20-m resolution, for GLM and MARS models

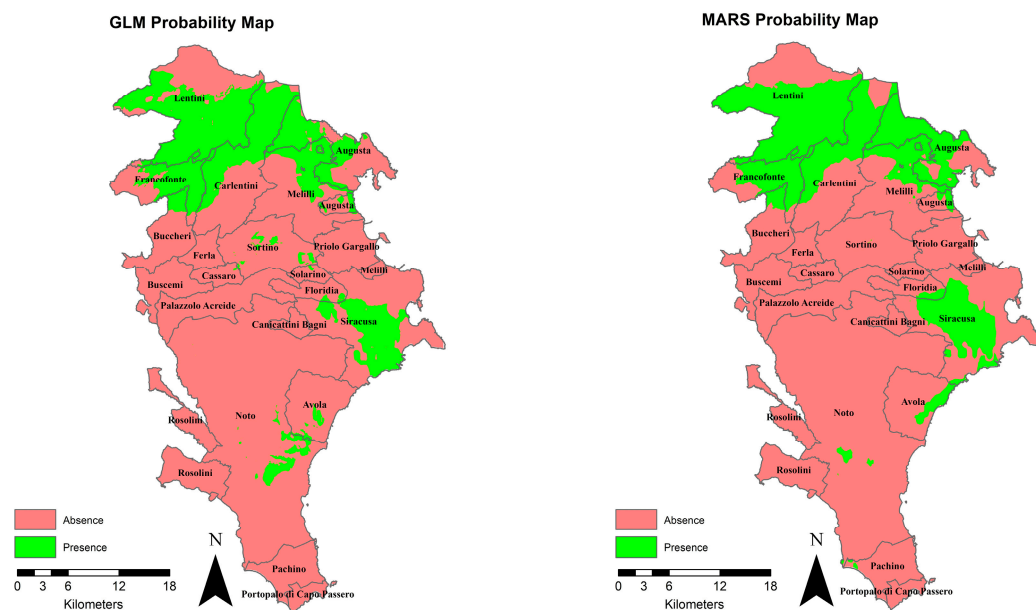

**Figure S2** - Probability maps of species, with 10000 presence points, 20-m resolution, and refined values of models' parameters for GLM and MARS models

BRT Probability Map

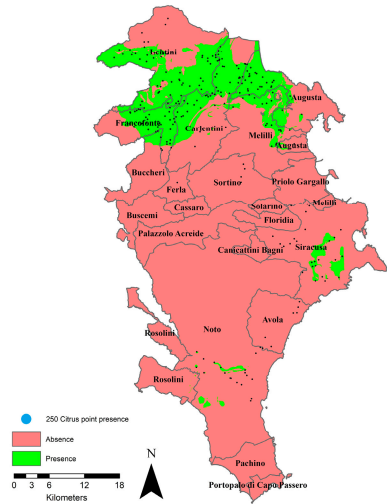

GLM Probability Map

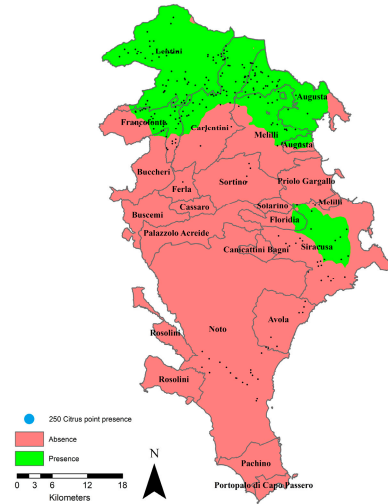

MAXENT Probability Map

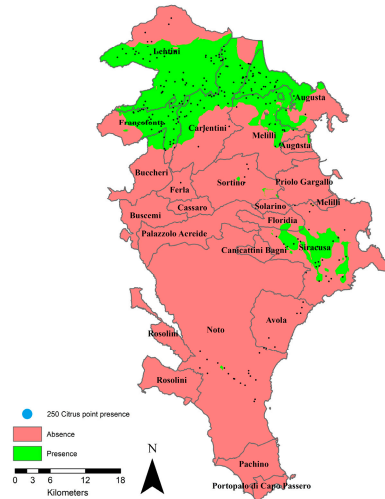

MAXENT Probability Map

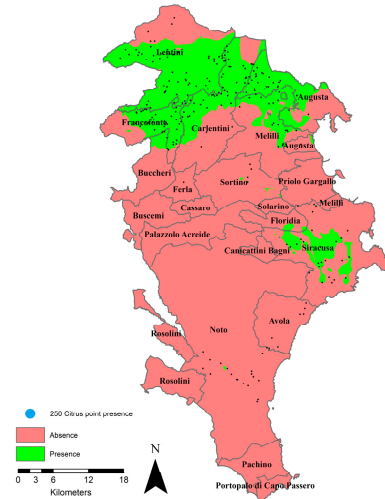

RF Probability Map

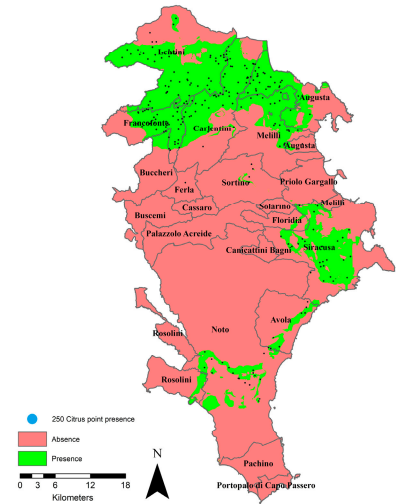

BRT Probability Map

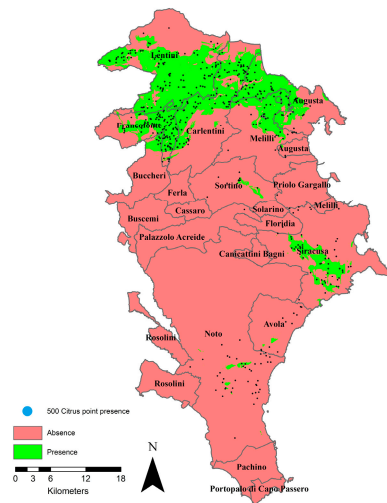

GLM Probability Map

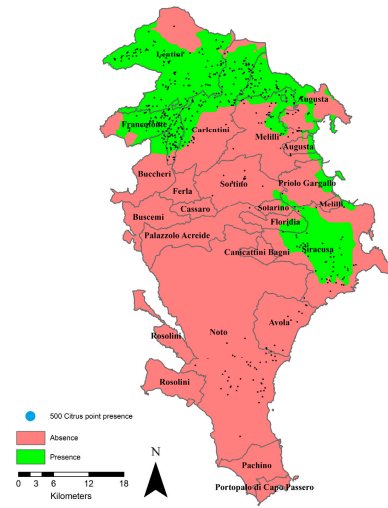

MARS Probability Map

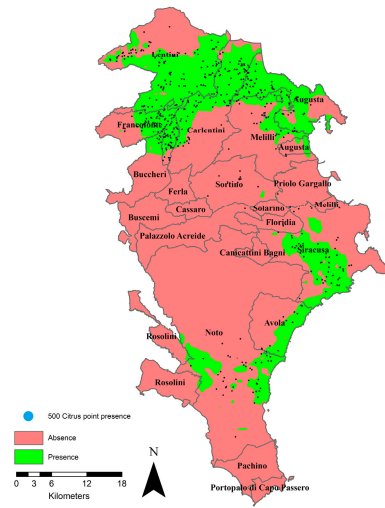

MAXENT Probability Map

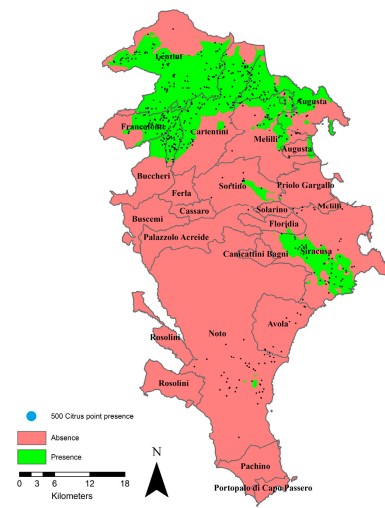

RF Probability Map

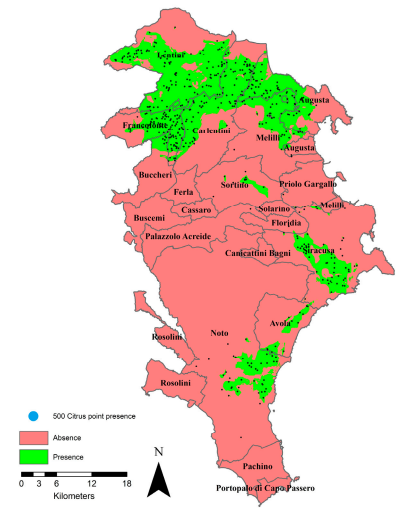

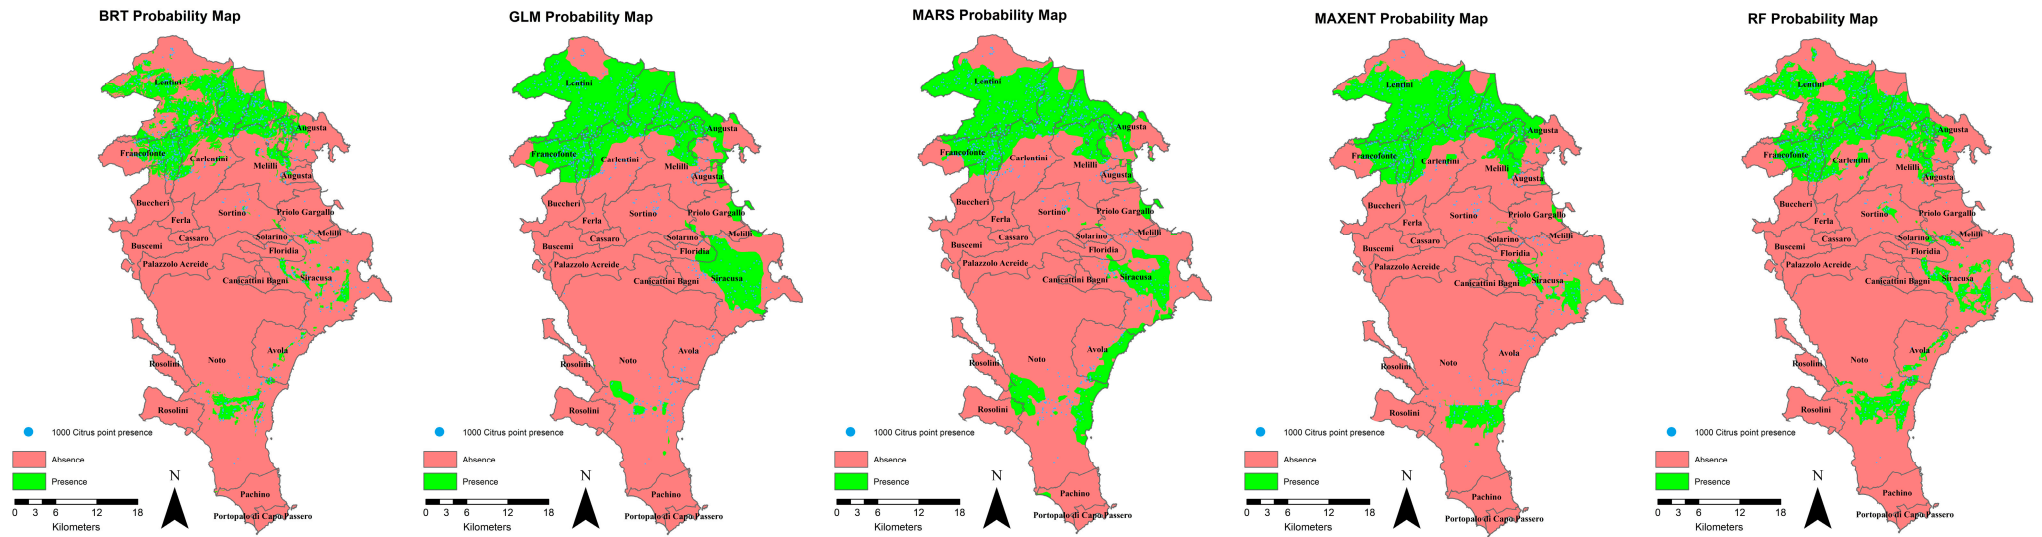

**Figure S3** - Probability maps of species distribution for 250-500-1000 presence points and for default values of parameters

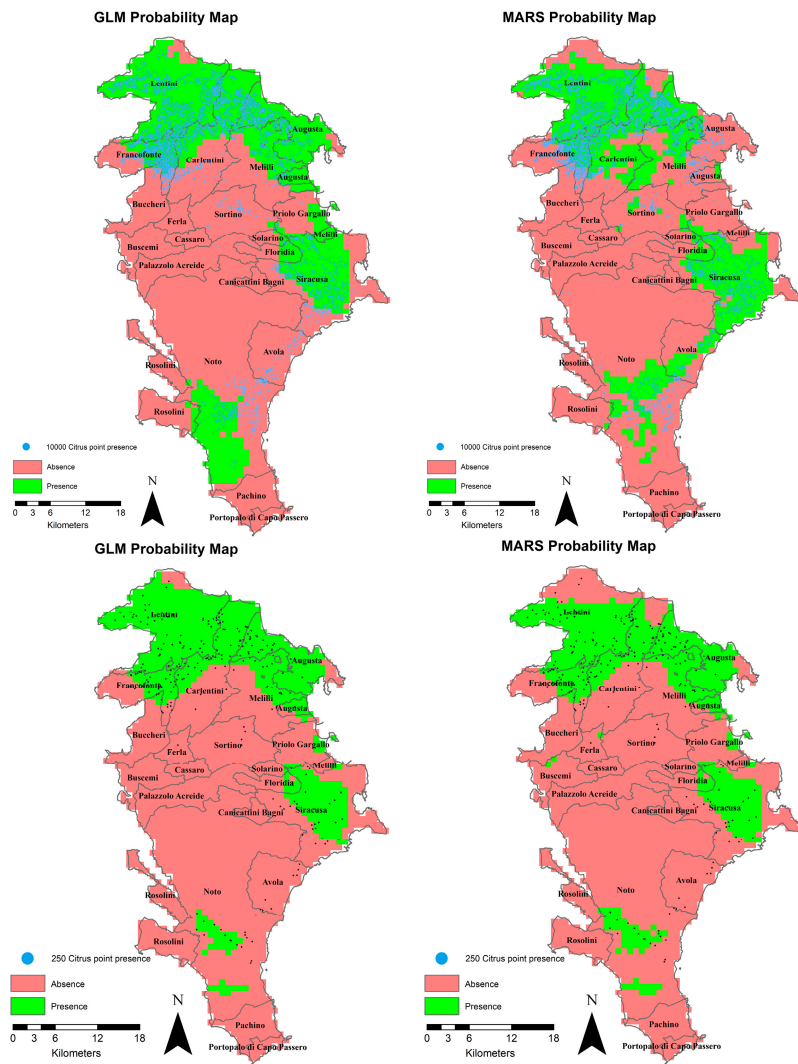

**Figure S4** - Maps of predicted citrus presence (green) or absence (red) for the different models, at a 1-Km resolution and 1000 and 250 input presence points for GLM and MARS model.
